# Genome plasticity, a key factor of evolution in prokaryotes

Itamar Sela<sup>1,\*</sup>, Yuri I. Wolf<sup>1</sup>, Eugene V. Koonin<sup>1,\*</sup>

<sup>1</sup>National Center for Biotechnology Information, National Library of Medicine, National Institutes of Health, Bethesda, MD 20894, USA

\*For correspondence: [itamar.sela@nih.gov](mailto:itamar.sela@nih.gov); [koonin@ncbi.nlm.nih.gov](mailto:koonin@ncbi.nlm.nih.gov)

1 **In prokaryotic genomes, the number of genes that belong to distinct functional classes shows**  
2 **apparent universal scaling with the total number of genes [1-5] (Fig. 1). This scaling can be**  
3 **approximated with a power law, where the scaling power can be sublinear, near-linear or super-**  
4 **linear. Scaling laws are robust under various statistical tests [4], across different databases and for**  
5 **different gene classifications [1-5]. Several models aimed at explaining the observed scaling laws have**  
6 **been proposed, primarily, based on the specifics of the respective biological functions [1, 5-8].**  
7 **However, a coherent theory to explain the emergence of scaling within the framework of population**  
8 **genetics is lacking. We employ a simple mathematical model for prokaryotic genome evolution [9]**  
9 **which, together with the analysis of 34 clusters of closely related microbial genomes [10], allows us to**  
10 **identify the underlying forces that dictate genome content evolution. In addition to the scaling of the**  
11 **number of genes in different functional classes, we explore gene contents divergence to characterize**  
12 **the evolutionary processes acting upon genomes [11]. We find that evolution of the gene content is**  
13 **dominated by two factors that are specific to a functional class, namely, selection landscape and**  
14 **genome plasticity. Selection landscape quantifies the fitness cost that is associated with deletion of a**  
15 **gene in a given functional class or the advantage of successful incorporation of an additional gene.**  
16 **Genome plasticity, that can be considered a measure of evolvability, reflects both the availability of**  
17 **the genes of a given functional class in the external gene pool that is accessible to the evolving**  
18 **microbial population, and the ability of microbial genomes to accommodate these genes. The**  
19 **selection landscape determines the gene loss rate, and genome plasticity is the principal determinant**  
20 **of the gene gain rate.**

21

22 Power-laws are the simplest functions that give good fits to the data on gene scaling. However,  
23 given that genome sizes barely span two orders of magnitude (Fig. 1), these power functions should be  
24 treated as approximations rather than firmly established quantitative laws. These limitations  
25 notwithstanding, analysis of the scaling exponents using the power law approximation has shown that  
26 such exponents are (nearly) universal for each functional class across a broad range of microbes  
27 (notwithstanding some debate on the validity of the exact universality [4, 12]), suggesting that  
28 differences in scaling reflect important, not yet understood features of cellular organization and its  
29 evolution. In the seminal work on scaling, Van Nimwegen grouped the functional classes of genes along  
30 three integer exponents: 0,1,2, arguing that deviations from the integers most likely reflected gene  
31 classification ambiguities [5]. The gene classes with the 0 exponent include information processing  
32 systems (translation, basal transcription and replication), those with the exponent of 1 are primarily  
33 metabolic genes, and those with the exponent 2 are regulatory genes. In biological terms, the essential  
34 information processing systems are universally conserved and remain nearly the same in all microbes  
35 regardless of genome size; metabolic pathways expand proportionally to genome growth; and the  
36 complexity of regulatory circuits increases quadratically with the total number of genes. The toolbox  
37 model has been proposed to explain the quadratic scaling whereby the number of regulators grows  
38 faster than the number of metabolic enzymes thanks to the frequent re-use of the latter in new  
39 pathways [6, 7]. From the evolutionary standpoint, it has been suggested that the universal exponents  
40 are determined by distinct gene gain and loss rates for different classes of genes and represent the  
41 “innovation potential” of these classes [13]. Clearly, regulatory genes have the highest innovation  
42 potential whereas information processing systems have next to none. Here we formulate an explicit  
43 model for the gene gain and loss and express the scaling in terms of the evolutionary forces that emerge

44 from our analysis, namely, the selection landscape and genome plasticity. The scaling that we obtain  
45 from this simple model does not follow a power law exactly but gives a comparable quality of fit within  
46 the range of available data.

47 In the current study, we analyzed 20 functional classes of genes from the Clusters of  
48 Orthologous Groups (COGs) [14]. For the collection of microbial genomes analyzed here, the scaling  
49 exponents span a range from 0.35 for translation genes (J COG category) to 1.69 for secondary  
50 biosynthesis genes (Q COG category) in our dataset (Table 1). It should be noted that the transcription  
51 category has an exponent of 1.63 because, in the COG classification, it includes both basal transcription  
52 proteins that, in the initial analysis, showed exponents close to 0, and transcription regulators, with the  
53 apparent quadratic dependence on the total number of genes. The analysis presented here imply that,  
54 in principle any scaling exponent is possible. Indeed, the observed values of gene category-specific  
55 exponents do not seem to perfectly fit the 0-1-2 paradigm but do show a broad range, with increasing  
56 exponents from the essential, universal information transmission genes to the more evolutionarily  
57 volatile genome components such as regulators and secondary metabolism enzymes. The robustness of  
58 the observed scaling exponents for different classes was tested by bootstrap analysis (Fig. S1; see  
59 Methods). Although, for some of the functional classes, the distribution of the bootstrap scaling  
60 exponents was wide (*e.g.* secretion and motility genes (N); Fig. S1), the classes could be confidently  
61 partitioned into those scaling sub-linearly, near-linearly or super-linearly. The wide distributions also  
62 result in some pairs of classes overlapping (Table S1; see Methods). However, as shown below, similar  
63 scaling exponent can emerge from very different combinations of selection landscapes and genome  
64 plasticity (*e.g.* secretion and motility genes (N) and the mobilome (X)).

65 We sought to uncover the evolutionary roots of the differential scaling of the functional classes  
66 of genes within the framework of the general theory of genome evolution by gene gain and loss.  
67 Prokaryotic genome evolution involves extensive horizontal gene transfer (HGT) and gene loss that can  
68 be expected to shape, among other features, the differential scaling [3, 15-17]. The simplest model for  
69 genome size dynamics describes the genomic evolutionary trajectory as a succession of stochastic gain  
70 and loss events [9]. The dynamics of the total number of genes in the genome  $x$  is therefore determined  
71 by the per genome gain and loss rates ( $P^+$  and  $P^-$ ), respectively

$$72 \quad dx/dt = P^+ - P^- \quad [1]$$

73 One of the key observable measures of microbial genome evolution is the pairwise intersection between  
74 genomes  $I$ , that is, the number of orthologous genes shared by a pair of genomes. Both the number of  
75 genes and the pairwise intersections between gene complements reflect genome content evolution and  
76 result from the same evolutionary processes. A complete theoretical description of genome evolution  
77 should therefore account for both these quantities. The stochastic gain and loss of genes entail a decay  
78 in pairwise genomes similarity through the course of evolution, even when the total number of genes  
79 remains approximately constant. As a first order approximation, pairwise genome intersections decay  
80 exponentially with the tree distance, with the decay constant  $k$  that is proportional to per-gene loss rate  
81  $k \propto P_-/x$  (see Methods for formal derivation). For an infinite gene pool [18]

$$82 \quad I(d) = x \cdot e^{-kd} \quad [2]$$

83 where  $d$  is the distance between the genomes along the tree. Given an infinite external gene pool, the  
84 rate of pairwise genome similarity decay is determined solely by gene loss rate. This model fits

85 comparative genomic observations on the pairwise genome similarity decay with evolutionary distance  
86 in archaea, bacteria and bacteriophages [11] [19] [20]. We tested these observations on the ATGC set  
87 used for the present analysis and confirmed the close agreement of the model with the data (Fig. 2A,  
88 and Fig. S2).

89 To account for the dynamics of distinct functional classes of genes, we define gain and loss rates  
90 for the respective subsets of genes. Like the complete genome, each functional class ( $x_1$ ) is subject to  
91 stochastic gains and losses of genes that occur with rates  $P_1^+$  and  $P_1^-$ , respectively

$$92 \quad dx_1/dt = P_1^+ - P_1^- \quad [3]$$

93 Below we express gain and loss rates explicitly and show how  $P_1^+$  and  $P_1^-$  are related to the overall  
94 genome gain and loss rates  $P^+$  and  $P^-$ . With respect to the genome content, all quantities can be  
95 defined for genomic subsets that include only genes from a specific functional class. We define class-  
96 specific pairwise intersection (i.e. the number of genes of class 1 shared between the pair of genomes)  
97  $I_1$ . Similar to its complete genome analog, the class-specific pairwise intersection decays exponentially  
98 with evolutionary distance. The decay constant  $k_1$  is proportional to the class-specific per-gene loss rate  
99  $k_1 \propto P_1^-/x_1$ . Empirically, gene classes with sublinear exponents are characterized by slow decay of  
100 pairwise intergenome similarity whereas those with super-linear exponents show fast decay (Figs. 2A-C  
101 and supplementary Figs. S3-S22).

102 Assuming finite effective population size with the weak genome dynamics limit (gain and loss  
103 rates are low enough such that gains and losses, hereafter “mutations”, occur and get fixed  
104 sequentially), gain and loss rates can be expressed as the product of the mutation rate and the  
105 probability for the mutation to get fixed in the population [9]. Mutation events are either an acquisition  
106 or a deletion of one gene, with the respective rates  $\alpha$  and  $\beta$ . Accordingly, gain and loss rates can be  
107 written as

$$108 \quad P^+ = \alpha(x) \cdot F(S_0) \quad [5]$$

$$109 \quad P^- = \beta(x) \cdot F(-S_0) \quad [6]$$

110 where  $F$  is the fixation probability and  $S_0$  is the genomic mean of the selection coefficient normalized by  
111 effective population size (see Methods). The  $S_0$  value can be regarded as the mean selective benefit (or  
112 cost) associated with the acquisition or loss of a random gene. Specifically, Eqs. 5 and 6 imply a  
113 symmetry in the selective effect with respect to gain and loss of a single gene: the benefit (or cost) is of  
114 equal magnitude for both events but with opposite signs [9, 21]. However, a closer examination of the  
115 gene acquisition process reveals a more complicated picture that involves two distinct time scales. Even  
116 genetic material that is beneficial on a large time scale, appears to be slightly deleterious initially, and  
117 fitness is recovered only after a transient time of several hundred generations [22]. In contrast, the  
118 coefficient  $S_0$  is inferred from extant genomes and thus reflects the average cost (or benefit) of gene  
119 deletion, and accordingly, the long-term average benefit (or cost) carried by a gene already incorporated  
120 in the genome. Within this formulation, the short time scale, that is, the transient phase of gene  
121 acquisition, is accounted for by the gain rate  $\alpha$ . Specifically,  $\alpha$  represents the product of the raw  
122 acquisition rate and gene acceptability, that is, the probability that the acquired gene is not rejected by  
123 the population within the short time scale.

124 Gain and loss rates for genes that belong to a specific functional class can be expressed following a  
125 similar reasoning. The class-specific selection landscape that determines the fixation probability term  
126 can differ from the mean selection landscape of the complete genome. We first develop the formulation  
127 of the loss rate which, under the assumption that deletions occur at random loci across the genome, is  
128 given by the complete genome deletion rate  $\beta$  multiplied by the fraction of the genome that is occupied  
129 by genes of a specific functional class. Together with the fixation probability for a deletion event that  
130 depends on the class-specific mean selection coefficient,  $S_1$ , this gives

$$131 \quad P_1^- = \frac{x_1}{x} \cdot \beta(x) \cdot F(-S_1) \quad [7]$$

132 for the class-specific loss rate. The acquisition rate for class-specific genes is given by the product of the  
133 global acquisition rate  $\alpha$ , fixation probability that depends on the class-specific mean selection  
134 coefficient,  $S_1$ , and the class-specific genome plasticity  $p$ :

$$135 \quad P_1^+ = p_1 \cdot \alpha(x) \cdot F(S_1) \quad [8]$$

136 where the product  $p_1 \cdot \alpha$  denotes the probability that an acquired gene belongs to the specific  
137 functional class. As in the complete genome case, this formulation of class-specific gain and loss rates  
138 implies a symmetry between gain and loss, with respect to the selective effect. Accordingly,  $S_1$   
139 quantifies the long-term benefit or cost. If the short-term behavior is similar across all genes, the  
140 probability of a successful uptake of a gene is taken into account in the category-specific gain rate of Eq.  
141 8 by  $\alpha$ . In this case,  $p_1$  simply represent the class-specific genes availability, that is, the fraction of class-  
142 specific genes in the external gene pool. However, as described in detail below, the analysis of the  
143 scaling laws together with the pairwise intersection of the gene sets shows that  $p_1$  is genome size-  
144 dependent and does not fit the assumption of uniform acceptability across all classes of genes. The  
145 coefficient  $p_1$  therefore reflects not only the availability of class-specific genes, but also the class-specific  
146 ability of the microbial cell to tolerate additional genes of the given functional class within the short  
147 time scale. Hence we denote  $p_1$  class-specific genome plasticity.

148 Under the assumption that the genome size is approximately constant, the scaling laws can be  
149 derived from the relation between  $x$  and  $x_1$  that is expressed through the selection landscapes and  
150 genome plasticity (see Methods for derivation)

$$151 \quad x = (1/p_1(x_1)) \cdot x_1 \cdot e^{-\Delta S_1(x_1)} \quad [9]$$

152 where  $\Delta S_1$  is the mean selective (dis)advantage of a gene in the given functional class with respect to a  
153 random gene

$$154 \quad \Delta S_1 = S_1 - S_0 \quad [10]$$

155 Eq. 9 describes the scaling of the number of genes in a functional class with the total genome size, and  
156 can be interpreted as follows. If class-specific genome plasticity  $p_1$  is independent of the number of  
157 genes in the class, the scaling is determined by  $\Delta S_1$ . For constant  $\Delta S_1$ , the scaling is linear, and the slope  
158 is greater (smaller) than  $p_1$  for genes that are on average more (less) beneficial than the genome-wide  
159 average, that is,  $\Delta S_1 > 0$  ( $\Delta S_1 < 0$ ). Sublinear or super-linear scaling occurs for constant genome  
160 plasticity when  $\Delta S_1$  depends on the number of genes  $\Delta S_1 = \Delta S_1(x_1)$ . Specifically, the scaling is sublinear  
161 (super-linear) when  $\Delta S_1$  decreases (increases) with  $x_1$ .

162 The derivation above provides the theoretical framework for inferring the class-specific  
163 selection landscapes and genome plasticity. The selection landscape determines the loss rate, whereas  
164 the genome plasticity is the principal determinant of the gain rate. The number of genes in a genome  
165 represents the balance between the two rates but pairwise genome intersections are determined by the  
166 loss rate alone. Thus, the genome intersection is a crucial ingredient in the analysis and allows us to  
167 disentangle selection landscape and genome plasticity, and determine the dependence of each of these  
168 factors on the number of genes. Because the scaling laws are robust with respect to local influences and  
169 are (nearly) universal across all prokaryotes (see Fig. 1), the evolutionary forces underlying scaling are  
170 likely to be universal to this extent as well. In particular, we assume that the functional class-specific  
171 selection landscapes and genome plasticity are similar for all genomes. Recently, however, we have  
172 shown that genome size evolution is subject to local effects and is governed by taxon-specific factors  
173 [21], in addition to the universal factors. To circumvent this taxon-specificity, represented here by the  
174 genome-wide acquisition and deletion rates  $\alpha$  and  $\beta$ , we normalize the class-specific decay constant  $k_1$   
175 by the genomic mean decay constant  $k$ , for each ATGC separately. This normalization cancels out the  
176 ATGC-specific factors and allows us to infer the universal selection landscape and genome plasticity. We  
177 show that both factors depend on the genome size and thus contribute to the shaping of the genome  
178 content, and specifically, the scaling laws. Throughout the analysis we rely on our previous results [21]  
179 for the genome-wide selection landscape  $S_0$  (see Methods).

180 In the following, we show that the observed scaling exponents, together with the class-specific  
181 selection landscape that emerge from pairwise intersection, are consistent only with genome plasticity  
182 that depends on the number of genes. We first infer the selection landscape from the pairwise  
183 intersections. The class-specific  $\Delta S_1$ , is inferred from the ratio between the class-specific decay constant  
184 and the genomic mean (see Methods for derivation)

$$185 \quad k_1/k = F(-(\Delta S_1 + S_0))/F(-S_0) \quad [11]$$

186 Given that we consider the ratio  $k_1/k$ , the taxon-specific deletion rate  $\beta$  cancels out, and the ratio  
187 depends only on global factors, allowing an unbiased comparison among the ATGCs. The interpretation  
188 of Eq.11 is that genes that are associated with larger selection coefficients are exchanged less frequently  
189 than those that are subject to a weaker selection. For example, amino acid metabolism genes (E) show a  
190  $k_1/k$  ratio that increases with the number of genes (Fig. 2D), suggesting that the fitness cost of deletion  
191 of genes in this class drops for larger genomes. This behavior is typical and common to most functional  
192 classes, with the notable exception of defense genes (V) and the mobilome (X; the entirety of integrated  
193 mobile genetic elements) (Fig. S23). Accordingly,  $\Delta S_1$  decreases with the class-specific number of genes  
194  $x_1$  (Fig. 2E and Fig. S24). However, as explained above, constant plasticity combined with  $\Delta S_1$  that  
195 decreases with genome size, result in a sublinear scaling (see Eq. 9). The only way to reconcile the  
196 decreasing selection coefficient and super-linear scaling is to introduce genome size-dependent genome  
197 plasticity  $p_1 = p_1(x_1)$ . The next step in the analysis is therefore to infer the genome plasticity, which  
198 can be extracted from the gain probabilities ratio (see Methods for derivation)

$$199 \quad (k_1 x_1)/(k x) = p_1(x_1) \cdot F(\Delta S_1 + S_0)/F(S_0) \quad [12]$$

200 Similarly to Eq. 11, the genome-wide acquisition rate  $\alpha$ , which can be subject to local influences [21],  
201 cancels out, allowing us to infer the selection landscape and genome plasticity from Eqs. 11 and 12. For



202 simplicity, we use linear approximations for  $\Delta S_1(x_1)$  and for  $p_1(x_1)$ , to fit the data (Figs. 2E and 2F, and  
203 Supplementary Figs. S23 - S26; see Methods for details).

204 To better understand how the number of genes in each class is determined by the selection  
205 landscape and genome plasticity, it is useful to compare different classes in some detail. For example,  
206 for amino acid metabolism genes (E), the  $k_1/k$  ratio is below unity (Fig. 2D), and accordingly,  $\Delta S_1$  is  
207 positive even for larger genomes (Fig. 2E). For this gene class, plasticity increases with the genome size  
208 (Fig. 2F), leading to the observed moderate super-linear scaling, despite the decrease in  $\Delta S_1$  with  $x_1$  (see  
209 Eq. 9). In contrast, the abundance of transcription genes (K), primarily, regulators, grows with the  
210 genome size such that the  $k_1/k$  ratio becomes greater than unity (Fig. 2G) which correspond to  $\Delta S_1$   
211 turning negative (Fig. 2H). The higher abundance and the super-linear scaling of transcription genes (K)  
212 is therefore attributed to the genome plasticity of this class, which is twice as high as that for amino acid  
213 metabolism genes (E) (Figs. 2F and 2I). This interplay between the selection landscape and genome  
214 plasticity is common for all gene classes, and consequently, there is a strong negative correlation  
215 between the mean values of  $\Delta S_1$  and genome plasticity (Fig. 2J; Spearman correlation coefficient  $\rho =$   
216  $-0.79$  (p-val  $< 10^{-3}$ ).

217 Finally, we tested the model consistency by reconstructing the scaling laws using the fitted  
218 selection landscapes and genome plasticity. Specifically, for each gene class, the fitted selection  
219 landscape and genome plasticity were substituted into Eq. 9, (Fig. 3A). For most classes, the fit quality of  
220 our model was comparable to albeit slightly worse than that of the power law fit (Table S2). The  
221 immediate source of errors in model fitting is the linear approximations for  $\Delta S_1$  and for genome  
222 plasticity. Although not optimal, a linear approximation was applied to minimize the number of  
223 assumptions and parameters in the model, and can be regarded as a first order expansion of the actual  
224 functions. It should be noted that, unlike with the direct power law fit of  $x_1$  vs  $x$  data, the parameters  
225 for the model-derived scaling were inferred from the combination of the number of genes and pairwise  
226 similarity decay rates in ATGCs (Eqs. 11 and 12), that is, measurable quantities that characterize genome  
227 evolution. For all functional classes, with the exception of the defense systems (V) and the mobilome  
228 (X), the relative selection coefficient is positive and decreases with the genome size (Fig. 2E and  
229 Supplementary Fig. S24). For all except 3 functional classes (L, replication and repair; D, cell division; and  
230 V, defense), genome plasticity increases with the number of genes (Fig. 2F and Fig. S26), that is, the  
231 larger the genome, the higher the probability that an additional gene can be incorporated into the  
232 corresponding functional networks. Both the plasticity slope and the mean plasticity strongly, positively  
233 correlate with the scaling exponent, with respective Spearman correlation coefficients  $\rho = 0.81$   
234 (p-val  $< 10^{-3}$ ) and  $\rho = 0.74$  (p-val  $< 10^{-3}$ ) (Fig. 3B).

235 Functional classes with high plasticity, and accordingly, super-linear scaling exponents, are  
236 evolutionarily flexible and can be thought of as the microbial adaptation reserve. The biological  
237 properties of these classes appear compatible with this interpretation. Indeed, the 4 classes with the  
238 highest scaling exponents, namely, secondary metabolism (Q), transcription (K), signal transduction (T)  
239 and carbohydrate metabolism (G), are involved in reaction to rapidly changing environmental ques,  
240 including various biological conflicts (many of the Q category genes are involved in antibiotic production  
241 and resistance). These classes have high (G and K) or moderate (Q and T) plasticity and accordingly can  
242 accumulate in genomes to the point that the class-specific relative selection coefficient  $\Delta S_1$  becomes  
243 negative so that these genes incur a non-negligible fitness cost on the organism. The genome similarity  
244 decay constant ratio  $k_1/k$  for these functional categories is unity or greater in the majority of the

245 ATGCs, that is, these genes are also lost at rates similar or higher than the average gene, resulting in  
246 their overall dynamic evolution. Notably, the gene categories with only a general functional prediction  
247 (R) and without any prediction (S) also showed super-linear scaling (albeit less pronounced than the  
248 above 4 classes) and high plasticity, suggesting that at least some of these genes contribute to adaptive  
249 processes. In agreement with previous results [23], we found that defense systems and the mobilome  
250 (the entirety of integrated mobile elements) incur a fitness cost on prokaryotes, and the relative cost of  
251 the mobile elements is an order of magnitude greater than that of defense systems. Not surprisingly, the  
252 genome plasticity of the mobilome also stands out, being at least an order of magnitude greater than  
253 that of all other classes (Table 1). Conversely, for sublinear classes, plasticity is low, so that incorporation  
254 of additional genes is unlikely albeit becoming more accessible in larger genomes. The genes in these  
255 classes are responsible for house-keeping functions that contribute less to short-term adaptation than  
256 the super-linear gene classes.

257 As a characteristic of the evolution of gene classes that can be directly determined from genome  
258 comparison, we analyzed the category-specific core genomes and pangenomes [24] (Fig. 3C). The  
259 normalized core genome and pangenome sizes correlate with the scaling exponent significantly and  
260 negatively for the core but positively for the pangenome, with the respective Spearman correlation  
261 coefficients  $\rho = -0.55$  (p-val = 0.007) and  $\rho = 0.56$  (p-val = 0.005). As expected, sublinear  
262 categories are associated with large relative core genomes and small relative pangenomes, compared to  
263 super-linear categories that make the principal contribution to the pangenome expansion. Thus, class-  
264 specific genome plasticity appears to shape the dynamics and architecture of microbial pangenomes.

265 To summarize, we provide here a general theoretical model explaining the universal scaling of  
266 the functional classes of genes in prokaryotes. The fits to the genomic data obtained with this model are  
267 comparable, even if slightly inferior to direct power law fits. This model does not include any  
268 assumptions on specific relationships between different functional classes as postulated in the previous  
269 models. Instead, we introduce an additional class-specific parameter that governs gene gain and loss  
270 processes, besides the selection coefficient, which we denote genome plasticity. Plasticity reflects the  
271 strength of purifying selection against horizontally acquired genes that has been previously described as  
272 the HGT barrier [25] as well as the availability of the genes of the given functional class which itself  
273 depends on their abundance in the external gene pool. Plasticity can be considered one of the forms of  
274 evolvability, a much debated concept [26-30] that, however, becomes the key factor shaping genome  
275 evolution in our model.

276

## 277 Materials and Methods

278

### 279 Genomic dataset

280 Clusters of closely related species from the ATGC database [10] that contain 10 or more  
281 genomes each were used in the analyses. The database includes fully annotated genomes and a  
282 phylogenetic tree for each cluster. Within each cluster of genomes, genes are grouped into clusters of  
283 orthologs (ATGC-COGs). Out of all genome clusters that contain 10 genomes or more, we selected the  
284 36 genome clusters that match the following criteria: i) maximum pairwise tree distance is at least 0.1,  
285 and ii) the phylogenetic tree contains more than two clades, such that pairwise tree distances are



286 centered around more than two typical values. Two of the 36 genome clusters were identified as  
287 outliers and were excluded from the dataset. The 34 genome clusters analyzed in this study are listed in  
288 Table S3. The ATGC-COGs were assigned to functional categories as defined in the COG database [14].  
289 Genome sizes and sizes of functional classes of genes are given by the number of ATGC-COGs that are  
290 present in each genome and belong to the respective classes. Multiple genes from a single genome that  
291 belong to the same ATGC-COG were counted once. Genes without orthologs in other genomes (ORFans)  
292 genes were excluded from the analyses. Genome content analysis was performed for 20 COG  
293 categories. Functional classes of genes that were analyzed are listed in Table 1.

## 294 Genome size evolution model

295 Substituting the gain and loss rates,  $P^+$  and  $P^-$  of Eqs. 5 and 6, respectively, into the genome  
296 size dynamic of Eq. 1, we get the relation

$$297 \quad \frac{dx}{dt} = \alpha(x) \cdot F(S_0) - \beta(x) \cdot F(-S_0) \quad [13]$$

298 where scaling the time by the effective population size  $N_e$ , allows to express gain and loss rates through  
299  $S_0 = N_e s_0$ , where  $s_0$  is the genome-wide average of the selection coefficient. Finally, we used the fact  
300 that, if an acquisition event is associated with selection coefficient  $S_0$ , a deletion event would be  
301 associated with selection coefficient  $-S_0$  [9, 21]. The population size-scaled fixation probability  $F$  can be  
302 written as [31]

$$303 \quad F(S_0) = \frac{S_0}{1 - e^{-S_0}} \quad [14]$$

304 For a steady state, where  $P^+ = P^-$ , the selection and deletion bias are related by

$$305 \quad e^{S_0} = r(x) \quad [15]$$

306 where the deletion bias  $r$  is defined as  $r = \beta/\alpha$ . The equation above reflects the selection-drift balance.

## 307 Distinct functional classes of genes

308 In analogy to the stochastic equation for complete genome size dynamics, the dynamics of the  
309 number of genes that belong to a distinct functional class, denoted by  $x_1$ , can be obtained by  
310 substituting the category-specific gain and loss rates of Eqs. 7 and 8, respectively, into Eq. 3

$$311 \quad \frac{dx_1}{dt} = p_1(x_1) \cdot \alpha(x) \cdot F(S_1) - \frac{x_1}{x} \cdot \beta(x) \cdot F(-S_1) \\ 312 \quad [16]$$

313 We assume a steady state and set  $dx_1/dt = 0$  in the equation above. Expressing the deletion bias  $r =$   
314  $\beta/\alpha$  by the complete genome selection coefficient  $S_0$  using Eq. 15, we get the steady state relation of  $x$   
315 and  $x_1$ , given by Eq. 9.

## 316 Pairwise genome intersections $I$

317 To account for the genome content similarity, each genome is represented by a vector  $\mathbf{X}$  with  
318 elements that assume values of 1 or 0. Each entry represents an ATGC-COG, where 1 or 0 indicate  
319 presence or absence, respectively, of that ATGC-COG in the genome. Genome size  $x$  is then given by the  
320 sum of all elements in  $\mathbf{X}$ . The number of common genes  $I$  is defined as

$$321 \quad I(t) = \langle \mathbf{X} \cdot \mathbf{Y} \rangle \quad [17]$$

322 where  $\mathbf{X}$  and  $\mathbf{Y}$  are two vectors that represent the two genomes, the angled brackets indicate averaging  
323 over all possible pairs of genomes, and the dot operation stands for a scalar product. The pairwise  
324 genomes intersection dynamic is given by

$$325 \quad \frac{dI}{dt} = 2\langle (d\mathbf{X}/dt) \cdot \mathbf{Y} \rangle \quad [18]$$

326 where we used the fact that both averages are equal  $\langle (d\mathbf{X}/dt) \cdot \mathbf{Y} \rangle = \langle \mathbf{X} \cdot (d\mathbf{Y}/dt) \rangle$ . Assuming a finite  
327 gene pool of size  $L$ , we have

$$328 \quad \langle (d\mathbf{X}/dt) \cdot \mathbf{Y} \rangle = -P^- \cdot \frac{L}{L-x} \cdot I(t)/x + P^- \cdot \frac{x}{L-x} \quad [19]$$

329 where the last approximation relies on the steady state assumption  $P^+ \approx P^-$ . Substituting the relation  
330 above into the equation for the pairwise genome similarity time derivative and solving the differential  
331 equation, we obtain the exponential decay of the pairwise genome intersection to an asymptote  $x^2/L$

$$332 \quad I(t) = (I(0) - x^2/L) \cdot e^{-vt} + x^2/L \quad [20]$$

333 with decay constant

$$334 \quad v = \frac{2P^-}{x} \cdot \frac{L}{L-x} \quad [21]$$

335 Assuming a clock with respect to loss events, the time  $t$  can be translated into tree pairwise distance as  
336  $d = 2t/t_0$ . Further assuming that the gene pool is much larger than the mean genome size  $L \gg x$ , the  
337 pairwise similarity decays exponentially with respect to tree distance  $d$  as

$$338 \quad I(d) = x \cdot e^{-kd} \quad [22]$$

339 with decay constant

$$340 \quad k = \frac{t_0}{x} \cdot P^- \quad [23]$$

341 Note that the ratio  $P^-/x$  gives the per-gene loss rate. It is possible to consider pairwise genome  
342 intersections with respect to a subset of genes. The derivation of Eqs. 17-23 can be repeated for genes  
343 that belong to a specific functional class. The functional class-specific genome intersection is therefore  
344 given by

$$345 \quad I_1(d) = x_1 \cdot e^{-k_1 d} \quad [24]$$

346 with decay constant

$$347 \quad k_1 = \frac{t_0}{x_1} \cdot P_1^- \quad [25]$$

348 Note that for the ratio  $k_1/k$ , the time scaling constant  $t_0$  cancels out, and we have

$$349 \quad k_1/k = (x/x_1) \cdot (P_1^-/P^-) \quad [26]$$

### 350 [Extraction of pairwise genome intersections decay constants from genomic data](#)

351 Pairwise genome intersections  $I$  were calculated for all pairs of genomes in all genome clusters.  
352 Genome intersections were calculated for complete genomes as well as for different functional classes.  
353 Phylogenetic pairwise distances were extracted from the respective phylogenetic trees. The decay

354 constants  $k$  and  $k_1$  were obtained by fitting the data to exponential decays (see below). Because ORFans  
355 genes were excluded from the dataset, the intercept was forced to the number of genes. Pairwise  
356 genome intersections are shown for all ATGCs for complete genomes and for all functional classes in  
357 Figs. S2-S22.

### 358 Extraction of functional class-specific selection landscapes

359 To filter out taxon-specific factors [21] to the maximum extent possible, for each cluster of  
360 genomes we consider the category-specific quantities compared to the complete genome. Substituting  
361 the complete genome and class-specific gene loss rates of Eq. 6 and Eq. 8, respectively, into Eq. 26, we  
362 get the relation

$$363 \quad \frac{k_1}{k} = \frac{F(-S_1)}{F(-S_0)} \quad [27]$$

364 The class-specific selection landscape  $S_1$  is inferred from Eq. 27 as follows. The complete genome  
365 selection landscape  $S_0$  is known (see below), and the decay constants  $k$  and  $k_1$  are inferred from the  
366 data, as explained in the previous subsection. Finally, the genome plasticity is inferred using the gain  
367 rates. Under the steady state assumption, gain and loss rates are equal, such that Eq. 26 can be  
368 approximated by

$$369 \quad k_1/k = (x/x_1) \cdot (P_1^+/P^+) \quad [28]$$

370 Substituting the complete genome and category-specific gain rates of Eq. 5 and Eq. 7, respectively, we  
371 get the equation for the genome plasticity

$$372 \quad \frac{k_1 x_1}{k x} = p_1(x_1) \cdot \frac{F(S_1)}{F(S_0)} \quad [29]$$

373 In a previous study, we found that the complete genome selection landscape  $S_0$  is related to the total  
374 number of genes by [21]

$$375 \quad S_0 = \ln(0.7 \cdot x^{0.06}) \quad [30]$$

376 For simplicity,  $S_1$  is calculated relatively to  $S_0$ , and the difference is taken to first order in  $x_1$

$$377 \quad S_1 = S_0 - q(x_1 - \xi_1) \quad [31]$$

378 Similarly to  $\Delta S_1$ , the plasticity is taken as a first order function in  $x_1$

$$379 \quad p_1(x_1) = a + b \cdot x_1 \quad [32]$$

380 The resulting fits for the  $k_1/k$  ratio of Eq. 26, and the ratio of Eq. 28 are shown for all COG categories in  
381 Figs. S23 and S25, respectively. Fitted relative selection landscape  $\Delta S_1$  and genome plasticity are shown  
382 for all COG categories in Figs. S24 and S26, respectively.

### 383 Data fitting and model parameters optimization

384 The numbers of genes in each class are discrete counts that typically span about one order of  
385 magnitude. Accordingly, it is assumed that the errors follow negative binomial distribution, and fitting  
386 was performed by optimizing model parameters together with the negative binomial distribution  
387 dispersion parameter, such that the log-likelihood is maximal.

### 388 Inference of scaling power

389 Power law scaling exponents are obtained by fitting the genomic data to the curve  $x_1 = \eta \cdot x^\gamma$ .  
390 For each functional class, parameters  $a$  and  $\gamma$  together with the negative binomial distribution  
391 dispersion parameter are optimized by maximizing the log likelihood for all genomes in the dataset.  
392 Genomes that do not contain genes that belong to the respective class were excluded from the analysis.  
393 The resulting fits are shown in Fig. 1, and the fit AIC values are listed in Table S2.

### 394 Inference of pairwise intersection decay constants

395 The pairwise intersections decay constants  $k$  and  $k_1$  were inferred by fitting Eqs. 22 and 24  
396 separately for each ATGC to the genomic data. The intercept is set to the mean number of genes ( $x$  for  
397 complete genomes and  $x_1$  for class-specific genes), such that the decay constant and the negative  
398 binomial dispersion parameter are optimized by maximizing the log-likelihood. Genomes that do not  
399 contain genes that belong to the respective class were excluded from the analysis. Fits are shown in Figs  
400 S2-S22.

### 401 Optimizing model parameters

402 For each functional class, 4 model parameters,  $q$ ,  $\xi_1$ ,  $a$  and  $b$  of Eqs. 31 and 32, are optimized  
403 using the mean numbers of genes and decay constants for each ATGC,  $x$ ,  $x_1$ ,  $k$  and  $k_1$ . Specifically, all 4  
404 model parameters are optimized simultaneously using Eqs. 27 and 29, together with  $S_0$  of Eq. 30, by  
405 maximizing the goodness of fit  $R^2$  for both equations. Fits based on Eq. 27 are shown for all functional  
406 categories in Fig. S23, and those for Eq. 29 are shown in Fig. S25.

### 407 Statistical analysis of scaling exponents

408 For each functional class, power law is fitted to a collection of genes generated by bootstrapping  
409 the original dataset. Specifically, the sampled dataset is generated by sampling with replacement the  
410 ATGCs, and collecting all genomes in sampled ATGCs. Sampling is performed over ATGCs and not directly  
411 at the level of genomes in order to avoid sampling bias due to the different number of genomes in each  
412 ATGC. The distribution of the fitted scaling exponents is shown for each class for 1000 bootstrap  
413 samplings in Fig. S1. For each pair of classes, the distribution overlap  $C$  is calculated. Specifically, for  
414 categories X and Y, with scaling exponents  $\gamma^X \leq \gamma^Y$  for the original dataset and bootstrap exponents  $\gamma_i^X$   
415 and  $\gamma_j^Y$ , the overlap is given by

$$416 \quad C_{XY} = \left( \sum_{i=1}^{1000} \sum_{j=1}^{1000} c_{ij}^{XY} \right) / 1000^2$$

417 with

$$418 \quad c_{ij}^{XY} = \begin{cases} 1 & \text{for } \gamma_i^X > \gamma_j^Y \\ 0 & \text{else} \end{cases}$$

419 Given that, for the original dataset, the scaling exponent of class X is smaller than that of class Y, the  
420 overlap  $C_{XY}$  indicates the probability of a bootstrap exponent of class X to be greater than the bootstrap  
421 exponent of class Y. Accordingly,  $C_{XX} = 1/2$ .

## References

1. De Lazzari, E., et al., *Family-specific scaling laws in bacterial genomes*. Nucleic Acids Res, 2017. **45**(13): p. 7615-7622.
2. Konstantinidis, K.T. and J.M. Tiedje, *Trends between gene content and genome size in prokaryotic species with larger genomes*. Proc Natl Acad Sci U S A, 2004. **101**(9): p. 3160-5.
3. Koonin, E.V. and Y.I. Wolf, *Genomics of bacteria and archaea: the emerging dynamic view of the prokaryotic world*. Nucleic Acids Res, 2008. **36**(21): p. 6688-719.
4. Molina, N. and E. van Nimwegen, *Scaling laws in functional genome content across prokaryotic clades and lifestyles*. Trends Genet, 2009. **25**(6): p. 243-7.
5. van Nimwegen, E., *Scaling laws in the functional content of genomes*. Trends Genet, 2003. **19**(9): p. 479-84.
6. Maslov, S., et al., *Toolbox model of evolution of prokaryotic metabolic networks and their regulation*. Proc Natl Acad Sci U S A, 2009. **106**(24): p. 9743-8.
7. Pang, T.Y. and S. Maslov, *A toolbox model of evolution of metabolic pathways on networks of arbitrary topology*. PLoS Comput Biol, 2011. **7**(5): p. e1001137.
8. Grilli, J., et al., *Joint scaling laws in functional and evolutionary categories in prokaryotic genomes*. Nucleic Acids Res, 2012. **40**(2): p. 530-40.
9. Sela, I., Y.I. Wolf, and E.V. Koonin, *Theory of prokaryotic genome evolution*. Proc Natl Acad Sci U S A, 2016. **113**(41): p. 11399-11407.
10. Kristensen, D.M., Y.I. Wolf, and E.V. Koonin, *ATGC database and ATGC-COGs: an updated resource for micro- and macro-evolutionary studies of prokaryotic genomes and protein family annotation*. Nucleic Acids Res, 2017. **45**(D1): p. D210-D218.
11. Wolf, Y.I., et al., *Two fundamentally different classes of microbial genes*. Nat Microbiol, 2016. **2**: p. 16208.
12. Cordero, O.X. and P. Hogeweg, *Regulome size in Prokaryotes: universality and lineage-specific variations*. Trends Genet, 2009. **25**(7): p. 285-6.
13. Molina, N. and E. van Nimwegen, *The evolution of domain-content in bacterial genomes*. Biol Direct, 2008. **3**: p. 51.
14. Galperin, M.Y., et al., *Expanded microbial genome coverage and improved protein family annotation in the COG database*. Nucleic Acids Res, 2015. **43**(Database issue): p. D261-9.
15. Kolsto, A.B., *Dynamic bacterial genome organization*. Mol Microbiol, 1997. **24**(2): p. 241-8.
16. Koonin, E.V., *Comparative genomics, minimal gene-sets and the last universal common ancestor*. Nat Rev Microbiol, 2003. **1**(2): p. 127-36.

17. Mushegian, A.R. and E.V. Koonin, *A minimal gene set for cellular life derived by comparison of complete bacterial genomes*. Proc Natl Acad Sci U S A, 1996. **93**(19): p. 10268-73.
18. Baumdicker, F., W.R. Hess, and P. Pfaffelhuber, *The infinitely many genes model for the distributed genome of bacteria*. Genome Biol Evol, 2012. **4**(4): p. 443-56.
19. Plata, G., C.S. Henry, and D. Vitkup, *Long-term phenotypic evolution of bacteria*. Nature, 2015. **517**(7534): p. 369-72.
20. Mavrich, T.N. and G.F. Hatfull, *Bacteriophage evolution differs by host, lifestyle and genome*. Nat Microbiol, 2017. **2**: p. 17112.
21. Sela, I., Y.I. Wolf, and E.V. Koonin, *Estimation of universal and taxon-specific parameters of prokaryotic genome evolution*. PLoS One, 2018. **13**(4): p. e0195571.
22. Bershtein, S., et al., *Protein Homeostasis Imposes a Barrier on Functional Integration of Horizontally Transferred Genes in Bacteria*. PLoS Genet, 2015. **11**(10): p. e1005612.
23. Iranzo, J., et al., *Disentangling the effects of selection and loss bias on gene dynamics*. Proc Natl Acad Sci U S A, 2017. **114**(28): p. E5616-E5624.
24. McInerney, J.O., A. McNally, and M.J. O'Connell, *Why prokaryotes have pangenomes*. Nat Microbiol, 2017. **2**: p. 17040.
25. Sorek, R., et al., *Genome-wide experimental determination of barriers to horizontal gene transfer*. Science, 2007. **318**(5855): p. 1449-52.
26. Crombach, A. and P. Hogeweg, *Evolution of evolvability in gene regulatory networks*. PLoS Comput Biol, 2008. **4**(7): p. e1000112.
27. Lehman, J. and K.O. Stanley, *Evolvability is inevitable: increasing evolvability without the pressure to adapt*. PLoS One, 2013. **8**(4): p. e62186.
28. Masel, J. and M.V. Trotter, *Robustness and evolvability*. Trends Genet, 2010. **26**(9): p. 406-14.
29. Pigliucci, M., *Is evolvability evolvable?* Nat Rev Genet, 2008. **9**(1): p. 75-82.
30. Wagner, A., *Robustness, evolvability, and neutrality*. FEBS Lett, 2005. **579**(8): p. 1772-8.
31. McCandlish, D.M., C.L. Epstein, and J.B. Plotkin, *Formal properties of the probability of fixation: identities, inequalities and approximations*. Theor Popul Biol, 2015. **99**: p. 98-113.





## Figures

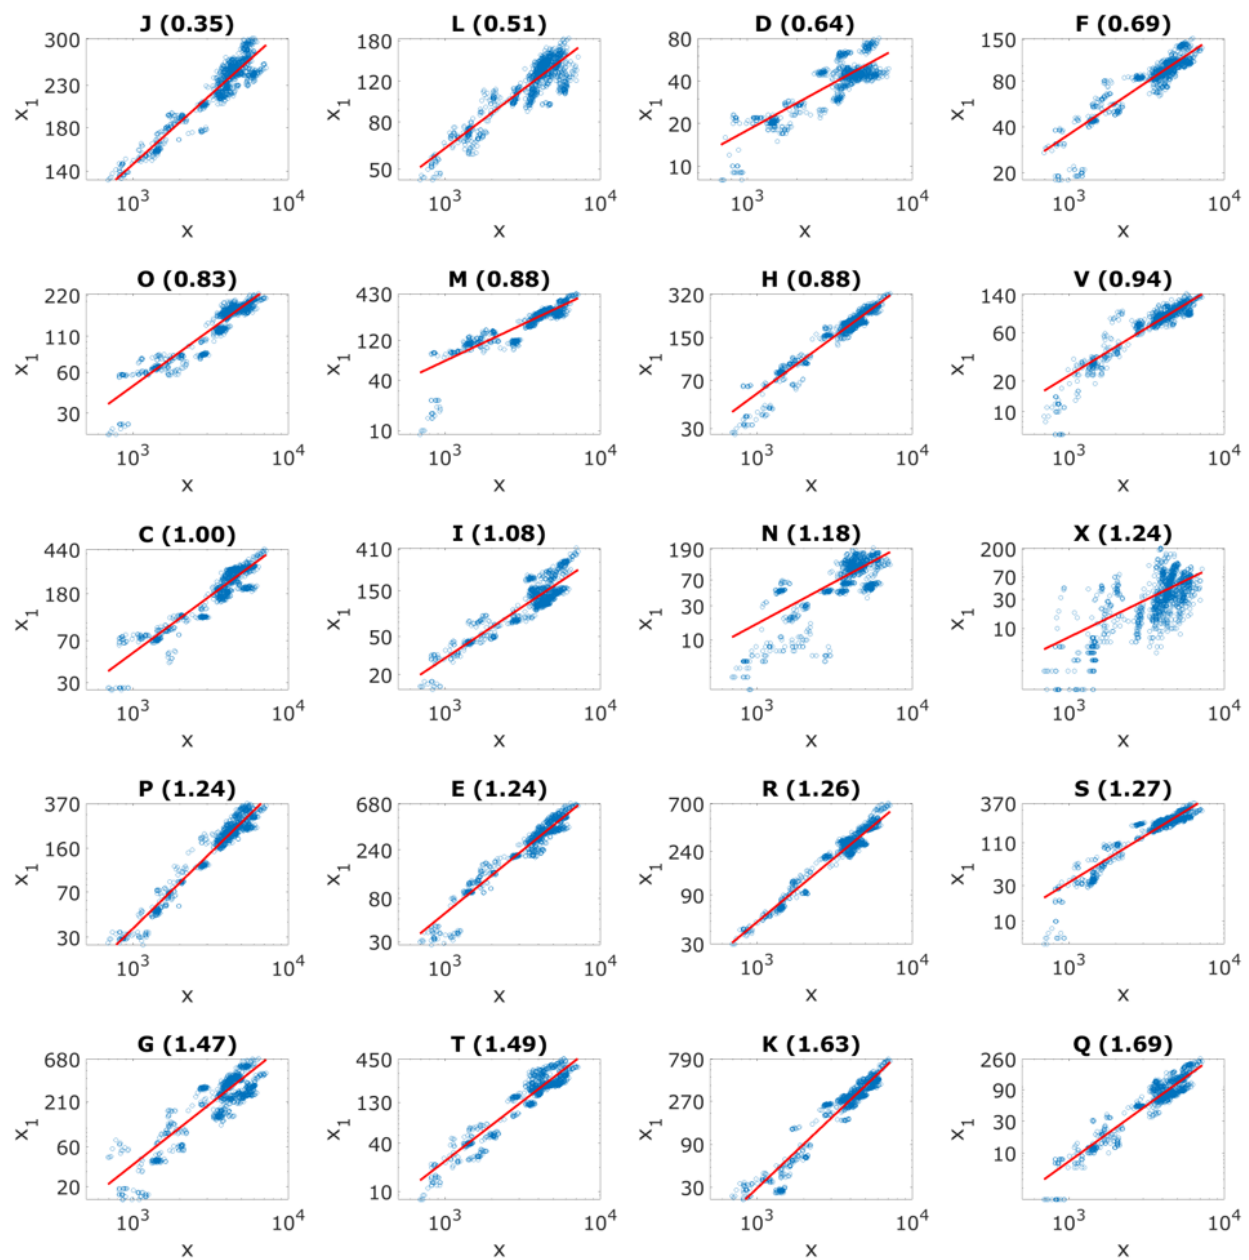

**Figure 1. Scaling laws for all functional classes of the COGs.** The number of genes in a given COG category is plotted against the total number of genes. Each point represents one genome from the analyzed set of 1490 genomes. The scaling is fitted to a power law which is indicated by a solid red line. The fitted scaling exponent is indicated in parentheses.

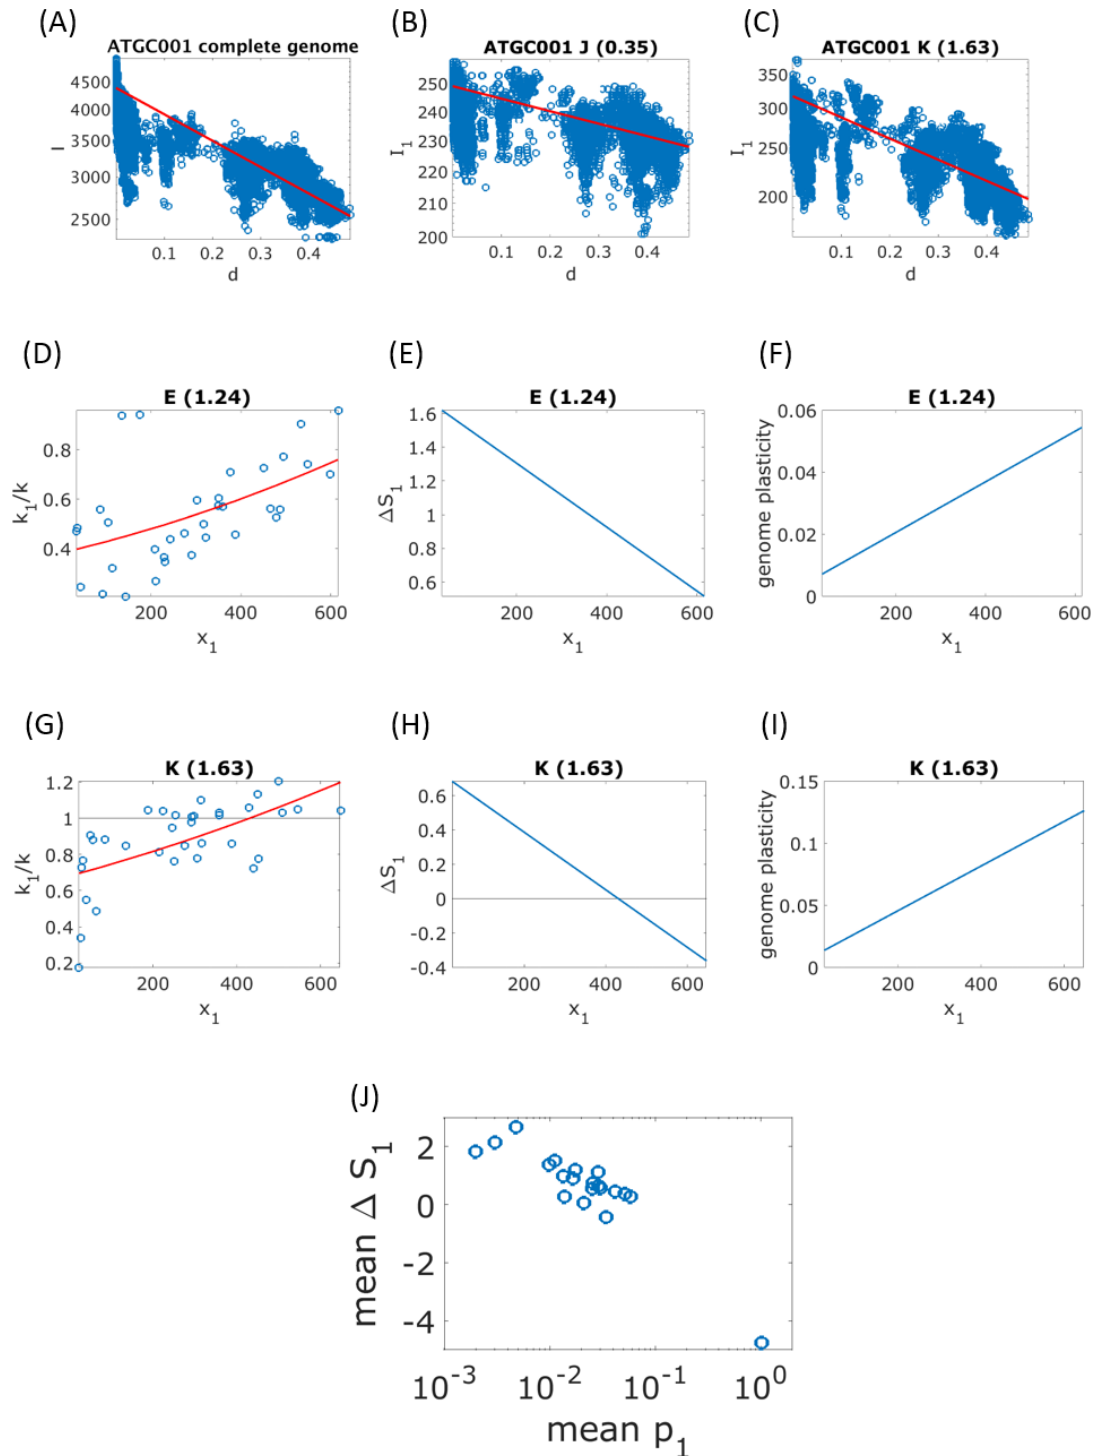

**Figure 2. Decay of gene content similarity, selection landscapes and genome plasticity.** (A) Pairwise genomes intersections  $I$  plotted against tree distance  $d$  for complete genomes of ATGC001. Each point represents a pair of genomes in the ATGC, and the exponential decay fit of Eq. 2 is shown by the red solid line. (B) Pairwise genomes intersections for translation genes (J) from genomes of ATGC001. Each point represents a pair of genomes in the ATGC, and the exponential decay fit of Eq. 21 is shown by the red solid line. (C) Pairwise genomes intersections for transcription genes (K) from genomes of ATGC001.

Each point represents a pair of genomes in the ATGC, and the exponential decay fit of Eq. 21 is shown by the red solid line). **(D)** Decay constant ratio  $k_1/k$  is plotted against the number of genes in the functional category  $x_1$  for amino acid metabolism genes (E). Each point corresponds to an ATGC from the dataset. The model fit based on Eq. 11 together with the complete and class-specific selection landscapes of Eqs. 29 and 30, respectively, is shown by the solid red line. **(E)** The class-specific selection coefficient  $\Delta S_1$  of Eq. 10 for amino acid metabolism genes (E), resulting from the fit shown in panel D. **(F)** Genome plasticity fitted using the linear approximation of Eq. 31 for amino acid metabolism genes (E). **(G)** Decay constant ratio  $k_1/k$  is plotted against the number of genes in the functional category  $x_1$  for transcription genes (K). Each point corresponds to an ATGC from the dataset. The model fit based on Eq. 11 together with the complete and class-specific selection landscapes of Eqs. 29 and 30, respectively, is shown by the solid red line. **(H)** The class-specific selection coefficient  $\Delta S_1$  of Eq. 10 for transcription genes (E), resulting from the fit shown in panel G. **(I)** Genome plasticity fitted using the linear approximation of Eq. 31 for transcription genes (K). **(H)** Mean  $\Delta S_1$  plotted against mean plasticity, for all functional classes. Mean values were calculated by averaging over all ATGCs.

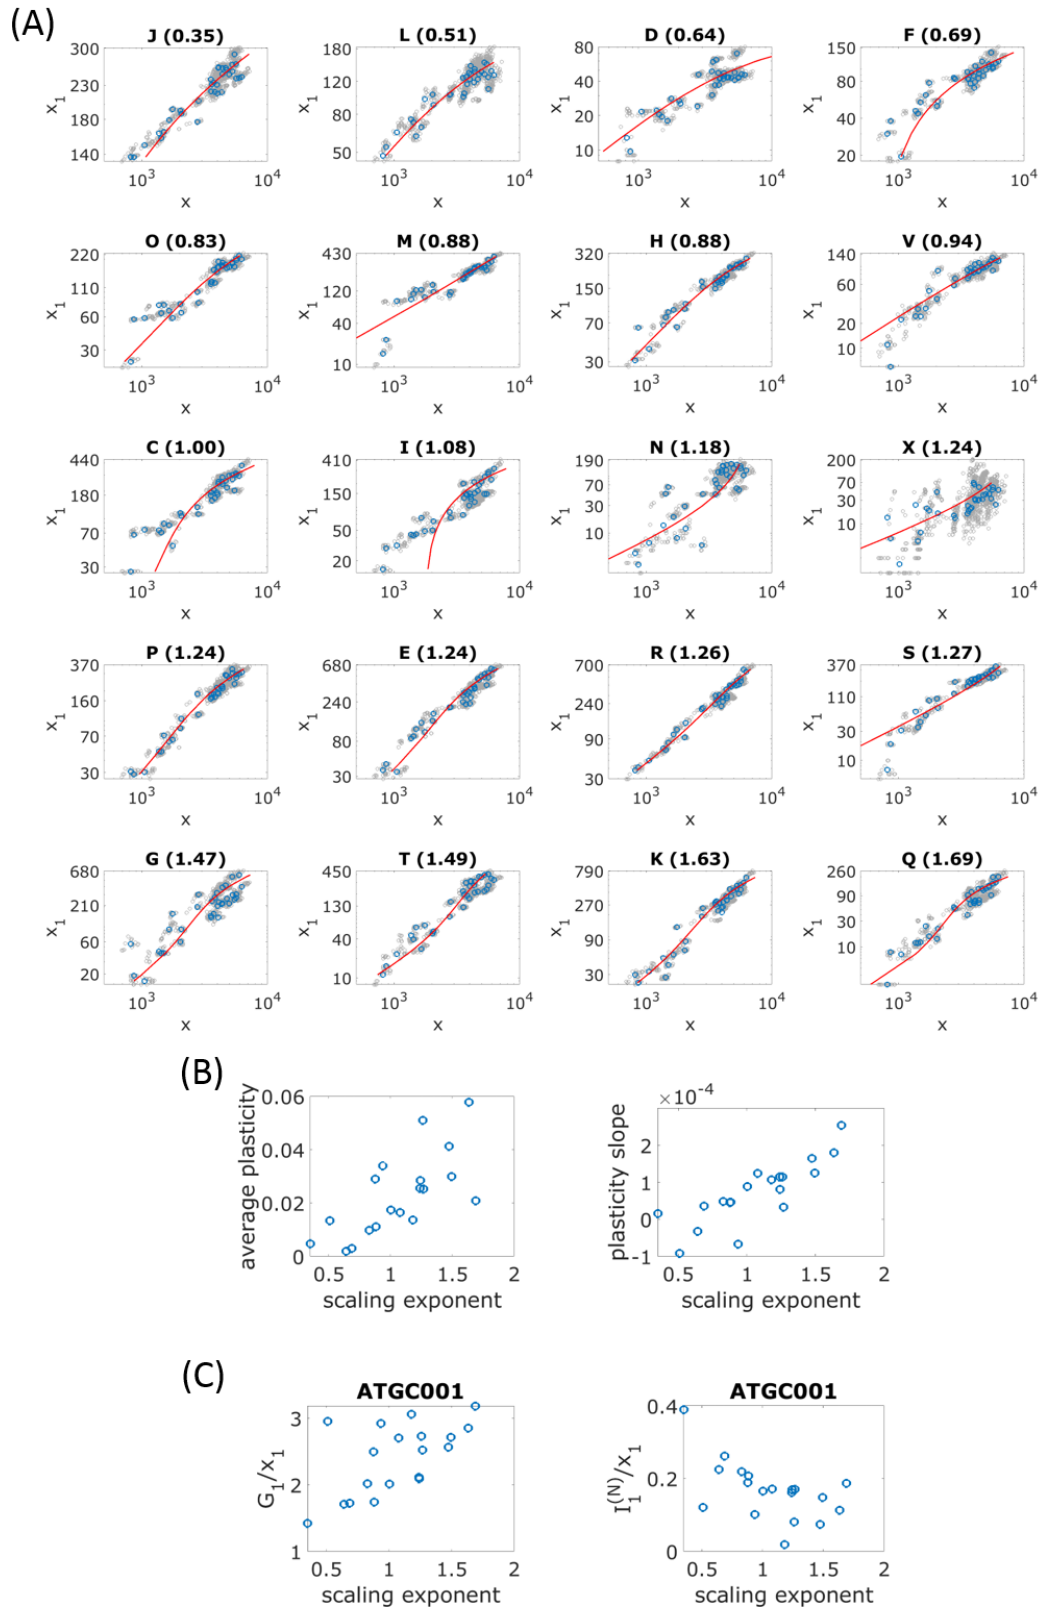

**Figure 3. Model-derived scaling exponents for different functional classes of genes, genome plasticity, core genomes and pangenomes. (A)** The number of genes in a COG functional category is plotted

against the total number of genes. Blue points correspond to the mean values for each ATGC in the dataset. Individual genomes are indicated by gray points. The model fit of Eq. 9 is shown by the solid red line. **(B)** Average plasticity across all ATGCs and plasticity slope are plotted against the scaling exponent. Each point corresponds to a functional class of genes. The mobilome is associated with genome plasticity that is an order of magnitude greater than those of the other gene classes, and was excluded from the plot. **(C)** Class-specific pangenome  $G_1$  and core genome  $I_1^{(N)}$  are plotted against the scaling exponent for ATGC001. Each point corresponds to a functional class of genes. To allow comparison between classes, pangenomes and core genomes are normalized by the number of genes in each class.

Table 1

**Scaling, selection and plasticity in different functional classes of microbial genes**

| Class | Functions                                                                 | scaling exponent | $\Delta S_1$ slope | average $\Delta S_1$ | average plasticity | plasticity slope |
|-------|---------------------------------------------------------------------------|------------------|--------------------|----------------------|--------------------|------------------|
| J     | translation                                                               | 0.35             | -1.10E-02          | 2.68                 | 0.005              | 1.54E-05         |
| L     | replication and repair                                                    | 0.51             | -1.35E-03          | 0.98                 | 0.013              | -9.18E-05        |
| D     | cell division                                                             | 0.64             | -1.58E-05          | 1.83                 | 0.002              | -3.21E-05        |
| F     | nucleotide metabolism and transport                                       | 0.69             | -1.75E-02          | 2.15                 | 0.003              | 3.65E-05         |
| O     | posttranslational modification, protein turnover, and chaperone functions | 0.83             | -5.42E-03          | 1.38                 | 0.010              | 4.88E-05         |
| M     | membrane and cell wall structure and biogenesis                           | 0.88             | -1.05E-03          | 0.65                 | 0.029              | 4.57E-05         |
| H     | coenzyme metabolism                                                       | 0.88             | -4.68E-03          | 1.51                 | 0.011              | 4.62E-05         |
| V     | defense                                                                   | 0.94             | -3.72E-07          | -0.44                | 0.034              | -6.68E-05        |
| C     | energy production and conversion                                          | 1.00             | -4.52E-03          | 1.19                 | 0.017              | 8.92E-05         |
| I     | lipid metabolism                                                          | 1.08             | -4.86E-03          | 0.92                 | 0.016              | 1.24E-04         |
| N     | secretion and motility                                                    | 1.18             | -7.13E-08          | 0.27                 | 0.014              | 1.07E-04         |
| X     | Mobilome: prophages, transposons                                          | 1.24             | -2.06E-04          | -4.76                | 1.021              | 1.12E-02         |
| P     | inorganic ion transport and metabolism                                    | 1.24             | -3.76E-03          | 0.75                 | 0.026              | 1.15E-04         |
| E     | amino acid metabolism and transport                                       | 1.24             | -1.90E-03          | 1.12                 | 0.028              | 8.15E-05         |
| R     | general functional prediction only                                        | 1.26             | -1.05E-03          | 0.37                 | 0.051              | 1.15E-04         |
| S     | function unknown                                                          | 1.27             | -5.92E-07          | 0.55                 | 0.025              | 3.35E-05         |



|   |                                                                  |      |           |      |       |          |
|---|------------------------------------------------------------------|------|-----------|------|-------|----------|
| G | carbohydrate metabolism and transport                            | 1.47 | -1.86E-03 | 0.46 | 0.041 | 1.65E-04 |
| T | signal transduction                                              | 1.49 | -1.28E-03 | 0.57 | 0.030 | 1.25E-04 |
| K | transcription                                                    | 1.63 | -1.67E-03 | 0.27 | 0.058 | 1.81E-04 |
| Q | biosynthesis, transport, and catabolism of secondary metabolites | 1.69 | -5.77E-03 | 0.06 | 0.021 | 2.54E-04 |

### Supplementary figures and table captions

FIG. S1: Statistical support for scaling exponents calculated using bootstrap (see Methods). The distribution of fitted scaling exponents is shown for each class, for 1000 bootstrap samplings. The mean of the distributions is indicated by vertical dashed blue line, and the fitted scaling exponent for the original dataset is indicated by a vertical solid red line.

FIG. S2: Pairwise genome intersections  $I$  for complete genomes is plotted against tree distance  $d$ . Exponential decay fit of Eq. 2 is shown by a solid red line. The ATGC numbers are indicated in figure titles.

FIG. S3-S22: Pairwise intersections  $I_1$  for COG functional category  $J$  is plotted against tree distance  $d$ . Exponential decay fit of Eq. 21 is shown by a solid red line. The ATGC numbers are indicated in figure titles.

FIG. S23: Pairwise intersections decay constants ratio  $k_1/k$  for all functional categories, together with fitted selection landscape (see Eq. 11). COG functional category name is indicated in the plot title, together with the functional category scaling exponent, which is indicated in parentheses.

FIG. S24: Fitted relative selection landscape  $\Delta S_1$  for all functional categories (see Eq. 10). COG functional category name is indicated in the plot title, together with the functional category scaling exponent, which is indicated in parentheses.

FIG. S25: The ratio  $(k_1 x_1) / (k x)$  for all functional categories, together with fitted selection landscape and genome plasticity (see Eq. 12). COG functional category name is indicated in the plot title, together with the functional category scaling exponent, which is indicated in parentheses.

FIG. S26: Fitted genome plasticity  $p(x_1)$  for all functional categories. COG functional category name is indicated in the plot title, together with the functional category scaling exponent, which is indicated in parentheses.

TABLE S1: Overlap of scaling exponent bootstrap distribution of Fig. S1 (see Methods).

TABLE S2: Comparison of the fit quality to the genomic data for power law scaling and model-derived scaling (Eq. 9) in terms of Akaike Information Criterion (AIC).

TABLE S3: Genome clusters (ATGCs) in the analyzed dataset.
